# Supplementary material for: A novel translational in-silico indication discovery framework identifies indications and predictive biomarkers for cenerimod
Source: Research Square preprint supplement (doi:10.21203/rs.3.rs-6993651/v1), 2025-08-20
Supplement: Supplementary file 1 [file 2f9bdbb67e3c040a12dafd0c.docx]

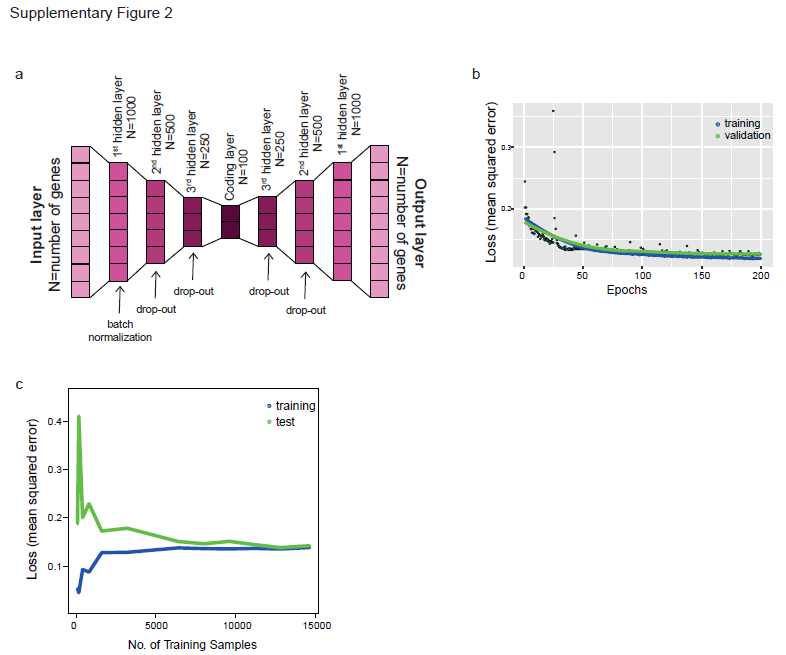


**Supplementary Figure 1:** **a)** Autoencoder design representation. N represents the number of nodes per layer. In the first hidden layer in the encoder batch normalization is applied, the second and third hidden layers were trained with 5% dropout to avoid overfitting. Exponential linear unit was used as activation function in all nodes. **b)** Training curve displaying loss (mean squared error) across training iterations (epochs) for training and validation sets. **c)** Plot showing model loss for training and test set (80/20) with increasing number of training samples, using epochs = 100. Because of 5% dropout rate in 2nd and 3rd hidden layers during training, test loss is lower than training loss at the highest number of training samples.


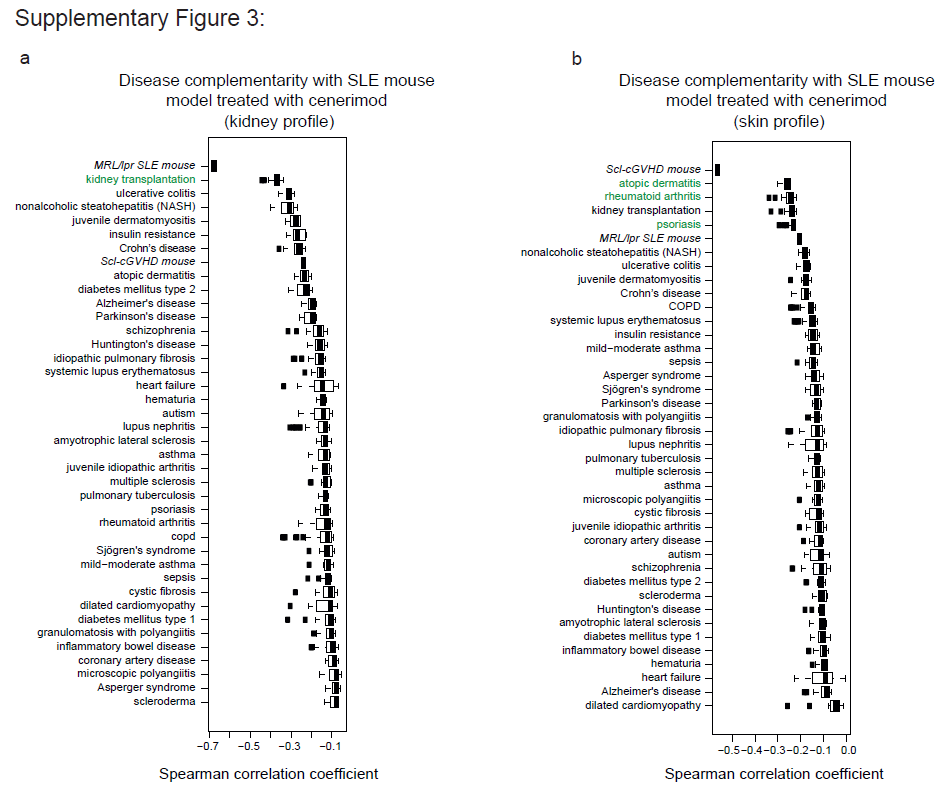


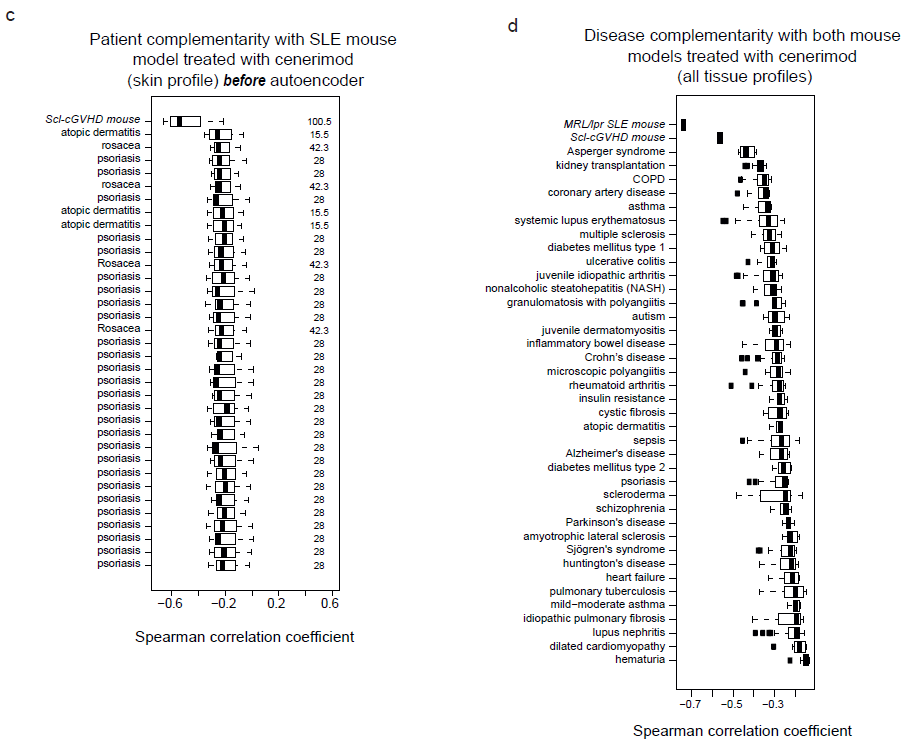
**Supplementary Figure 2: a)** Boxplots of human disease complementarity with MRL/lpr SLE mouse model with cenerimod in kidney (disease-level analysis). **b)** Boxplots of human disease complementarity with Scl-cGVHD mouse model with cenerimod in skin (disease-level analysis). **c)** Boxplots of human patient samples complementarity with Scl-cGVHD mouse model with cenerimod in skin before autoencoder processing. **a)** Boxplots of human disease complementarity with both mouse models with cenerimod in all tissues (disease-level analysis).
